# Supplementary material for: A unified solution for different scenarios of predicting drug-target interactions via triple matrix factorization
Source: PubMed Central journal article supplement (PMC6311903; doi:10.1186/s12918-018-0663-x), 2018-12-31
Supplement: 12918_2018_663_MOESM1_ESM.pdf [file 12918_2018_663_MOESM1_ESM.pdf]

# Triple Matrix Factorization

## Problem of Triple Matrix Factorization

Given the  $m \times n$  DTI matrix denoted as  $\mathbf{A}$ , the  $m \times p$  feature matrix as  $\mathbf{F}_d$  and the  $n \times q$  feature matrix as  $\mathbf{F}_t$  respectively. Suppose that  $\mathbf{A}_d$  is the  $m \times r$  latent interacting matrix of drugs,  $\mathbf{A}_t$  is the  $n \times r$  latent interacting matrix of targets. Our task is to minimize the following objective function:

$$J = \|\mathbf{A} - \mathbf{A}_d \mathbf{A}_t^T\|_F^2 + \|\mathbf{A}_d - \mathbf{F}_d \mathbf{B}_d\|_F^2 + \|\mathbf{A}_t - \mathbf{F}_t \mathbf{B}_t\|_F^2 + \lambda \|\mathbf{A}_d\|_F^2 + \mu \|\mathbf{A}_t\|_F^2 + \alpha \|\mathbf{B}_d\|_F^2 + \beta \|\mathbf{B}_t\|_F^2 \quad (1)$$

## Solution for S2, S3 and S4

The detailed solution can be achieved by Alternating Least Square (ALS), which iteratively solves a specific variable in turn by fixing other variables until reaching a convergence. In each round of its iterations, this procedure solves a set of equations in turn as follows  $\{ \frac{\partial J}{\partial \mathbf{A}_d} = 0, \frac{\partial J}{\partial \mathbf{A}_t} = 0, \frac{\partial J}{\partial \mathbf{B}_d} = 0, \frac{\partial J}{\partial \mathbf{B}_t} = 0 \}$ .

First, we solve the equations by the matrix-form formulas in the case of S2, S3 and S4 as follows:

$$\begin{aligned} \frac{\partial J}{\partial \mathbf{A}_d} &= 2(\mathbf{A} - \mathbf{A}_d \mathbf{A}_t^T)(-\mathbf{A}_t) + 2(\mathbf{A}_d - \mathbf{F}_d \mathbf{B}_d) + 2\lambda \mathbf{A}_d = 0 \\ \Rightarrow \mathbf{A}_d &= (\mathbf{A} \mathbf{A}_t + \mathbf{F}_d \mathbf{B}_d)(\mathbf{A}_t^T \mathbf{A}_t + \mathbf{I} + \lambda \mathbf{I})^{-1} \end{aligned} \quad (2)$$

$$\begin{aligned} \|\mathbf{A} - \mathbf{A}_d \mathbf{A}_t^T\|_F^2 &= \|\mathbf{A}^T - \mathbf{A}_t \mathbf{A}_d^T\|_F^2 \\ \frac{\partial J}{\partial \mathbf{A}_t} &= 2(\mathbf{A}^T - \mathbf{A}_t \mathbf{A}_d^T)(-\mathbf{A}_d) + 2(\mathbf{A}_t - \mathbf{F}_t \mathbf{B}_t) + 2\mu \mathbf{A}_t = 0 \\ \Rightarrow \mathbf{A}_t &= (\mathbf{A}^T \mathbf{A}_d + \mathbf{F}_t \mathbf{B}_t)(\mathbf{A}_d^T \mathbf{A}_d + \mathbf{I} + \mu \mathbf{I})^{-1} \end{aligned} \quad (3)$$

$$\begin{aligned} \frac{\partial J}{\partial \mathbf{B}_d} &= 2(-\mathbf{F}_d^T)(\mathbf{A}_d - \mathbf{F}_d \mathbf{B}_d) + 2\alpha \mathbf{B}_d = 0 & \frac{\partial J}{\partial \mathbf{B}_t} &= 2(-\mathbf{F}_t^T)(\mathbf{A}_t - \mathbf{F}_t \mathbf{B}_t) + 2\beta \mathbf{B}_t = 0 \\ \Rightarrow \mathbf{B}_d &= (\mathbf{F}_d^T \mathbf{F}_d + \alpha \mathbf{I})^{-1} (\mathbf{F}_d^T \mathbf{A}_d) & \Rightarrow \mathbf{B}_t &= (\mathbf{F}_t^T \mathbf{F}_t + \beta \mathbf{I})^{-1} (\mathbf{F}_t^T \mathbf{A}_t) \end{aligned} \quad (4)$$

## Solution for S1

Since some entries of  $\mathbf{A}$  in S1 are unobserved, we cannot get the matrix-form solution involving  $\mathbf{A}$ , but only the entry form of solution. To avoid the confusion of notions in the previous solution, we redefined the objective function:

$$\begin{aligned}
J &= \sum_i \sum_j \left( a_{ij} - \sum_k u_{ik} v_{jk} \right)_{(i,j) \in \Omega}^2 \\
&+ \sum_i \sum_k \left( u_{ik} - \sum_p f_{ip}^d b_{pk}^d \right)^2 + \sum_j \sum_k \left( v_{jk} - \sum_q f_{jq}^t b_{qk}^t \right)^2, \\
&+ \lambda \sum_i \sum_k (u_{ik})^2 + \mu \sum_j \sum_k (v_{jk})^2 \\
&+ \alpha \sum_i \sum_k (b_{pk}^d)^2 + \beta \sum_j \sum_k (b_{qk}^t)^2
\end{aligned} \tag{5}$$

where  $a_{ij}$  is the entry with the subscripts  $(i, j)$  in  $\mathbf{A}$ ,  $\Omega$  denotes the set of the observed entries of  $\mathbf{A}$ ,  $u_{ik}$ ,  $v_{jk}$ ,  $\mathbf{f}$  and  $\mathbf{b}$  are the entries of  $\mathbf{A}_d$ ,  $\mathbf{A}_t$ , feature matrices and regression coefficient matrices respectively. Thus, ALS can be used again to solve a set of equations in turn as follows  $\left\{ \frac{\partial J}{\partial u_{ik}} = 0, \frac{\partial J}{\partial v_{jk}} = 0, \frac{\partial J}{\partial b_{pk}^d} = 0, \frac{\partial J}{\partial b_{qk}^t} = 0 \right\}$ . Because the last two equations are not coupled with  $\mathbf{A}$ , we may still solve it by Formula (3). The solution of the first two equations for  $(i, j) \in \Omega$  is as follows.

$$\begin{aligned}
\frac{\partial J}{\partial u_{ik}} &= 2 \left( \sum_j \left[ \left( a_{ij} - \sum_s u_{is} v_{js} \right) (-v_{jk}) \right] + \left( u_{ik} - \sum_p f_{ip}^d b_{pk}^d \right) + \lambda u_{ik} \right) = 0 \\
\Rightarrow u_{ik} &= \frac{\sum_j \left[ \left( a_{ij} - \sum_{s \neq k} u_{is} v_{js} \right) v_{jk} \right] + \sum_p f_{ip}^d b_{pk}^d}{(1 + \lambda) + \sum_j (v_{jk})^2}, \tag{6}
\end{aligned}$$

$$\begin{aligned}
\frac{\partial J}{\partial v_{jk}} &= 2 \left( \sum_i \left[ \left( a_{ij} - \sum_t u_{it} v_{jt} \right) (-u_{ik}) \right] + \left( v_{jk} - \sum_q f_{jq}^t b_{qk}^t \right) + \mu v_{jk} \right) = 0 \\
\Rightarrow v_{jk} &= \frac{\sum_i \left[ \left( a_{ij} - \sum_{t \neq k} u_{it} v_{jt} \right) u_{ik} \right] + \sum_q f_{jq}^t b_{qk}^t}{(1 + \mu) + \sum_i (u_{ik})^2}. \tag{7}
\end{aligned}$$
