# Supplementary material for: A unified solution for different scenarios of predicting drug-target interactions via triple matrix factorization
Source: PubMed Central journal article supplement (PMC6311903; doi:10.1186/s12918-018-0663-x), 2018-12-31
Supplement: 12918_2018_663_MOESM2_ESM.pdf [file 12918_2018_663_MOESM2_ESM.pdf]

**Table a1.** Comparison with state-of-the-art approaches in terms of AUC

|    | NetLapRLS | WNN-GIP     | RLScore            | KBMF2K             | CMF                | NRLMF       | TMF                 |                    |
|----|-----------|-------------|--------------------|--------------------|--------------------|-------------|---------------------|--------------------|
| S1 | EN        | 0.972±0.002 | 0.964±0.003        | 0.962±0.003        | 0.905±0.003        | 0.969±0.002 | <u>0.987 ±0.001</u> | <b>0.989±0.001</b> |
|    | IC        | 0.969±0.003 | 0.959±0.003        | 0.967±0.003        | 0.961±0.003        | 0.981±0.002 | <u>0.989 ±0.001</u> | <b>0.989±0.001</b> |
|    | GPCR      | 0.915±0.006 | 0.944±0.005        | 0.925±0.007        | 0.926±0.006        | 0.940±0.007 | <u>0.969 ±0.004</u> | <b>0.983±0.003</b> |
|    | NR        | 0.850±0.021 | 0.901±0.017        | 0.850±0.030        | 0.877±0.023        | 0.864±0.026 | <u>0.950 ±0.011</u> | <b>0.978±0.008</b> |
| S2 | EN        | 0.786±0.023 | <b>0.882±0.015</b> | 0.791±0.021        | 0.713±0.029        | 0.829±0.019 | <u>0.871±0.017</u>  | 0.843±0.012        |
|    | IC        | 0.757±0.025 | 0.797±0.028        | 0.778±0.022        | 0.799±0.019        | 0.743±0.029 | <u>0.813 ±0.027</u> | <b>0.819±0.011</b> |
|    | GPCR      | 0.817±0.015 | 0.891±0.010        | 0.837±0.024        | 0.839±0.020        | 0.857±0.014 | <b>0.895±0.011</b>  | 0.882±0.009        |
|    | NR        | 0.789±0.039 | <u>0.890±0.023</u> | 0.776±0.041        | 0.844±0.023        | 0.818±0.036 | <b>0.900±0.021</b>  | 0.886±0.017        |
| S3 | EN        | 0.905±0.014 | 0.947±0.008        | 0.931±0.009        | 0.876±0.012        | 0.915±0.013 | <u>0.966±0.005</u>  | <b>0.976±0.001</b> |
|    | IC        | 0.914±0.012 | 0.950±0.007        | 0.937±0.009        | 0.938±0.008        | 0.905±0.012 | <u>0.964±0.007</u>  | <b>0.972±0.002</b> |
|    | GPCR      | 0.770±0.02  | 0.926±0.013        | 0.853±0.017        | 0.882±0.016        | 0.837±0.019 | <u>0.930±0.012</u>  | <b>0.959±0.007</b> |
|    | NR        | 0.655±0.046 | <b>0.935±0.017</b> | 0.736±0.034        | 0.668±0.060        | 0.680±0.066 | 0.851±0.027         | <u>0.929±0.029</u> |
| S4 | EN        | -           | -                  | 0.734±0.015        | <u>0.755±0.014</u> | -           | -                   | <b>0.802±0.015</b> |
|    | IC        | -           | -                  | 0.681±0.025        | <u>0.739±0.018</u> | -           | -                   | <b>0.751±0.014</b> |
|    | GPCR      | -           | -                  | <u>0.716±0.013</u> | 0.675±0.011        | -           | -                   | <b>0.817±0.012</b> |
|    | NR        | -           | -                  | 0.594±0.035        | <u>0.705±0.029</u> | -           | -                   | <b>0.735±0.026</b> |

The best results in each benchmark dataset under four kinds of CVs are highlighted in bold face and the second-best results are underlined.
